# Supplementary material for: Olive Oil Waste as a Source of Functional Food Ingredients: Assessing Polyphenolic Content and Antioxidant Activity in Olive Leaves
Source: MDPI journal article supplement (doi:10.3390/foods13020189), 2024-01-06
Supplement: s1 [file s1]

## Supporting Information

Olive Oil Waste as a Source of Functional Food Ingredients:

Assessing Polyphenolic Content and Antioxidant Activity in

Olive Leaves

Carolina L. Ronca <sup>1,2,3</sup>, Sara S. Marques <sup>1</sup>, Alberto Ritieni <sup>2,†</sup>, Rafael Giménez-

Martínez <sup>3</sup>, Luisa Barreiros <sup>1,4</sup>

and Marcela A. Segundo <sup>1,\*</sup>

<sup>1</sup> LAQV, REQUIMTE, Department of Chemical Sciences, Faculty of Pharmacy,

University of Porto,

4099-002 Porto, Portugal; carolinaronca@correo.ugr.es (C.L.R.); scmarques@ff.up.pt

(S.S.M.);

lbarreiros@ff.up.pt (L.B.)

<sup>2</sup> Department of Pharmacy, Faculty of Pharmacy, University of Naples “Federico II”,

80138 Naples, Italy

<sup>3</sup> Department of Nutrition and Bromatology, School of Pharmacy, University of

Granada, 18012 Granada, Spain;

rafaelg@ugr.es

<sup>4</sup> School of Health, Polytechnic Institute of Porto, 4200-072 Porto, Portugal

\* Correspondence: msegundo@ff.up.pt; Tel.: +351-220428676

† Deceased author.

**Table S1.** Geographical locations of olive leaves samples collection.

| <b>Sample ID</b> | <b>City</b>         | <b>GPS coordinates</b>         |
|------------------|---------------------|--------------------------------|
| <b>1</b>         | Arcos de Valdevez   | 41° 51' 24.4" N, 8° 25' 46.7"W |
| <b>2</b>         | Arcos de Valdevez   | 41° 51' 25.8"N, 8° 25' 46.9"W  |
| <b>3</b>         | Arcos de Valdevez   | 41° 51' 17.6"N, 8° 26' 09.9"W  |
| <b>4</b>         | Vila Nova de Gaia   | 41° 03' 52.1"N, 8° 32' 52."W   |
| <b>5</b>         | Braga               | 41° 32' 23,66"N, 8° 23' 34"W   |
| <b>6</b>         | Luso                | 40° 23' 15.2"N, 8° 23' 17.8"W  |
| <b>7</b>         | Vila Real           | 41° 15' 47"N, 7° 44' 5"W       |
| <b>8</b>         | Mirandela           | 41° 26' 23.8"N, 7° 17' 34.5"W  |
| <b>9</b>         | Cervães, Vila Verde | 41°35'58.8"N 8°31'08.8"W       |
| <b>10</b>        | Porto               | 41° 08' 58" N, 8° 36' 39"W     |
| <b>11</b>        | Paços de Ferreira   | 41°14'40.1"N 8°24'12.8"W       |
| <b>12</b>        | Celorico de Basto   | 41°23'57.6"N 8°00'05.4"W       |

**Table S2.** HPLC calibration curves for standard compounds.

| Standards      | Slope (L <sup>-1</sup> mg) | Intercept | R     | R <sup>2</sup> | LOD (mg L <sup>-1</sup> ) <sup>a</sup> |
|----------------|----------------------------|-----------|-------|----------------|----------------------------------------|
| Gallic acid    | 48595                      | -13528    | 0.998 | 0.996          | 0.07                                   |
| Hydroxytyrosol | 9724                       | -704      | 1.000 | 0.999          | 0.2                                    |
| Catechin       | 11545                      | -1786     | 1.000 | 0.999          | 0.1                                    |
| Oleuropein     | 4956                       | -1771     | 0.994 | 0.988          | 0.03                                   |
| Pinoresinol    | 34957                      | -12450    | 0.997 | 0.994          | 0.01                                   |
| Caffeic acid   | 98558                      | 17293     | 1.000 | 1.000          | 0.01                                   |
| Rutin          | 28909                      | 6008      | 0.987 | 0.974          | 0.03                                   |
| Quercetin      | 23356                      | -9533     | 1.000 | 0.999          | 0.2                                    |
| Luteolin       | 45584                      | -3772     | 0.989 | 0.978          | 0.2                                    |

<sup>a</sup> calculated from the signal to noise ratio, n=10. LOQ values were < 0.25 mg L<sup>-1</sup> for all tested compounds.

**Table S3.** TEAC values determined by each methodology for the polyphenolic compounds under analysis.

|                       | <b>Folin<sup>a</sup></b> | <b>CUPRAC<sup>b</sup></b> | <b>ABTS<sup>b</sup></b> | <b>DPPH<sup>b</sup></b> | <b>ORAC<sup>b</sup></b> |
|-----------------------|--------------------------|---------------------------|-------------------------|-------------------------|-------------------------|
| <b>Gallic Acid</b>    | 1.00 <sup>a</sup>        | 2.0 ± 0.1                 | 4.9 ± 0.1               | 5.3 ± 0.5               | 1.9 ± 0.1               |
| <b>Hydroxytyrosol</b> | 0.92 ± 0.01              | 1.60 ± 0.04               | 1.50 ± 0.01             | 0.99 ± 0.04             | 6 ± 1                   |
| <b>Catechin</b>       | 1.58 ± 0.01              | 2.39 ± 0.04               | 4.3 ± 0.1               | 3.3 ± 0.1               | 8.9 ± 0.6               |
| <b>Caffeic Acid</b>   | 0.98 ± 0.01              | 1.11 ± 0.03               | 2.11 ± 0.02             | 1.04 ± 0.03             | 6.5 ± 0.8               |
| <b>Rutin</b>          | 1.57 ± 0.01              | 1.9 ± 0.1                 | 2.55 ± 0.03             | 2.1 ± 0.2               | 10.2 ± 0.8              |
| <b>Oleuropein</b>     | 0.99 ± 0.01              | 2.07 ± 0.03               | 1.32 ± 0.02             | 0.99 ± 0.04             | 5.6 ± 0.2               |
| <b>Pinoresinol</b>    | 1.19 ± 0.01              | 1.19 ± 0.03               | 2.6 ± 0.1               | 1.1 ± 0.1               | 8 ± 1                   |
| <b>Quercetin</b>      | 2.0 ± 0.1                | 1.64 ± 0.02               | 3.3 ± 0.1               | 2.4 ± 0.1               | 11 ± 2                  |
| <b>Luteolin</b>       | 2.71 ± 0.02              | 2.08 ± 0.04               | 3.43 ± 0.06             | 2.0 ± 0.1               | 9 ± 1                   |
| <b>Verbascoside</b>   | 1.9 ± 0.1                | 4.2 ± 0.1                 | 2.48 ± 0.04             | 2.09 ± 0.08             | 5.7 ± 0.2               |

<sup>a</sup> TEAC values expressed in relation to gallic acid.

<sup>b</sup> TEAC values expressed in relation to Trolox.

**Table S4.** Content of polyphenols (mg) per g of olive leaves determined in liquid extracts before and upon lyophilization.

|                       | <b>Sample 5</b>       |                           | <b>Sample 7</b>       |                           |
|-----------------------|-----------------------|---------------------------|-----------------------|---------------------------|
|                       | <b>Liquid extract</b> | <b>Lyophilized powder</b> | <b>Liquid extract</b> | <b>Lyophilized powder</b> |
| <b>Hydroxytyrosol</b> | 7.4 ± 0.7             | 2.9 ± 0.1                 | 6.4 ± 0.3             | 1.6 ± 0.1                 |
| <b>Oleuropein</b>     | 485 ± 56              | 167 ± 1                   | 202 ± 6               | 40 ± 1                    |
| <b>Pinoresinol</b>    | 3.6 ± 0.3             | 1.45 ± 0.01               | 2.3 ± 0.2             | 0.58 ± 0.01               |
| <b>Verbascoside</b>   | 11.6 ± 0.3            | 4.35 ± 0.02               | 7.5 ± 0.5             | 1.88 ± 0.01               |
| <b>Rutin</b>          | 5.0 ± 0.5             | 3.0 ± 0.1                 | 4.4 ± 0.4             | 2.5 ± 0.1                 |
| <b>Quercetin</b>      | 1.4 ± 0.1             | 0.70 ± 0.01               | 1.2 ± 0.1             | 0.59 ± 0.1                |
| <b>Luteolin</b>       | 1.7 ± 0.1             | 0.83 ± 0.03               | 4.9 ± 0.2             | 1.45 ± 0.04               |

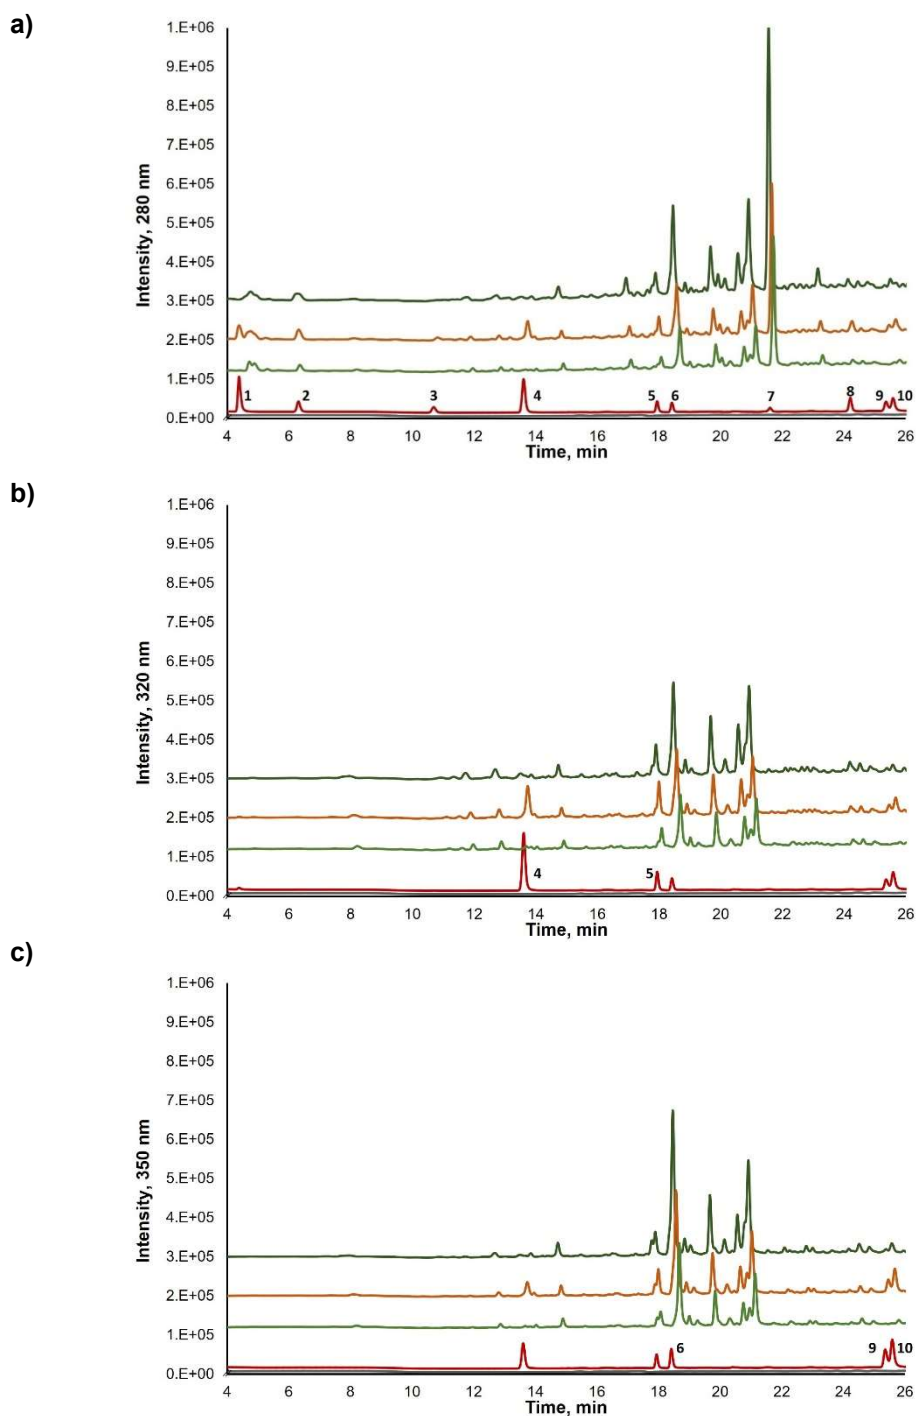

**Figure S1.** Chromatograms at (a) 280 nm, (b) 320 nm and (c) 350 nm depicting: a standard solution containing 10 mg L<sup>-1</sup> of the following compounds (red line): 1) gallic acid, 2) hydroxytyrosol, 3) catechin, 4) caffeic acid, 5) verbascoside, 6) rutin, 7) oleuropein, 8) pinoreosin, 9) quercetin, and 10) luteolin; 50% (v/v) EtOH extract from sample 5, undiluted (dark green line) and diluted 2× (light green line) and, for the same extract, diluted 2× supplemented with 5 mg L<sup>-1</sup> of each compound (orange line). Compounds 1-3, 7, 8 were monitored at 280 nm; compounds 4 and 5 were monitored at 320 nm; compounds 6, 9, 10 were monitored at 350 nm. The grey line represents the injection of mobile phase.

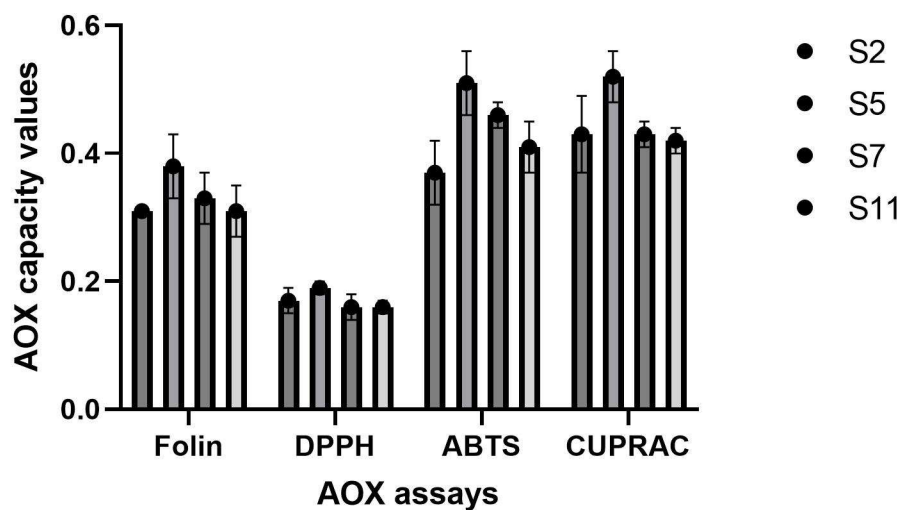

**Figure S2.** Antioxidant (AOX) capacity values (mean  $\pm$  SD) for samples 2, 5, 7 and 11 as determined by Folin, DPPH, ABTS and CUPRAC methods.
